# Supplementary material for: Photosynthetic Characteristics of Smaller and Larger Cell Size-Fractioned Phytoplankton Assemblies in the Daya Bay, Northern South China Sea
Source: MDPI journal article supplement (doi:10.3390/microorganisms10010016), 2021-12-23

## Supplemental Figure

**Figure S1:** Daily changes in concentrations ( $\mu\text{M}$ ) of ammonium (A,  $\text{NH}_4^+$ ), nitrite (B,  $\text{NO}_2^-$ ), nitrate (C,  $\text{NO}_3^-$ ), silicate (D,  $\text{SiO}_3^{2-}$ ), phosphate (E,  $\text{PO}_4^{3-}$ ) and N:P ratio (F) in surface ( $\sim 0.2$  m) and bottom ( $\sim 3.5$  m) layers of experimental site during March 25-26 of 2021. Grey shadows indicate the nighttime.

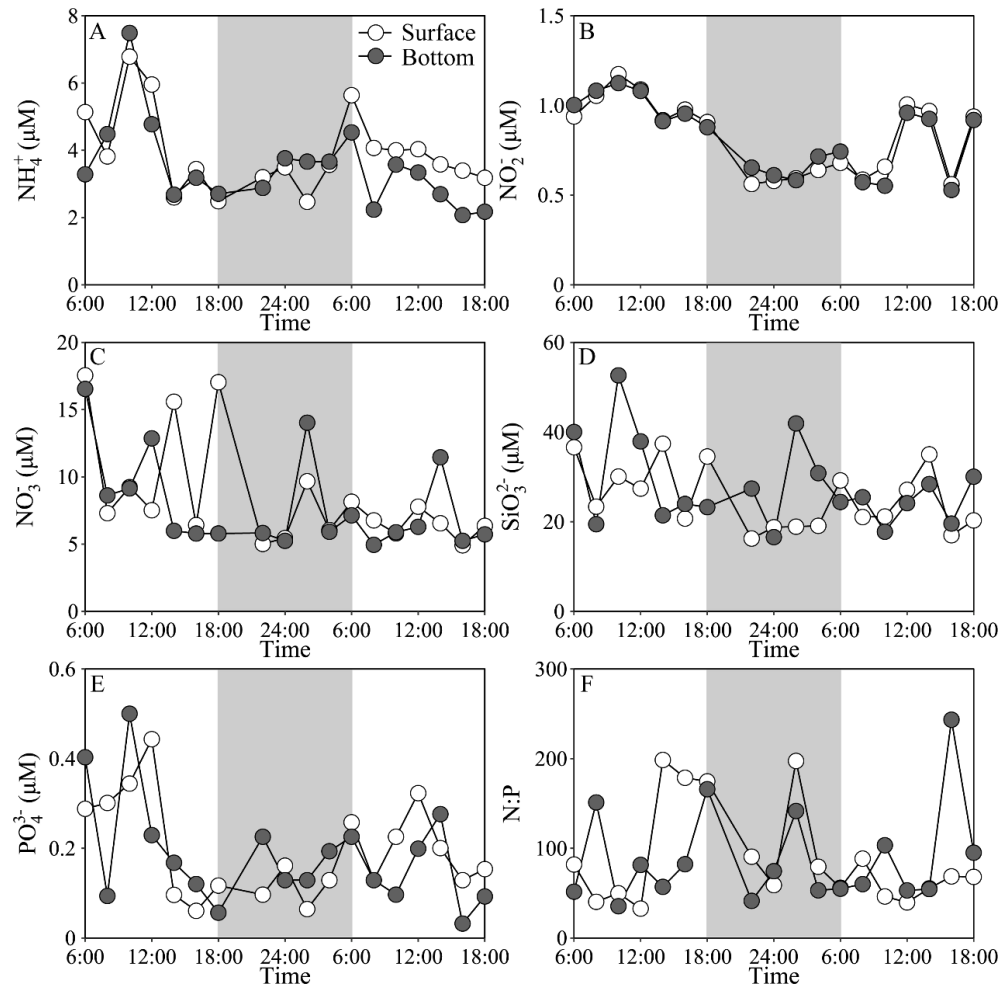

Supplement: s1 [file s1]
